# Supplementary material
Source: Springer Nature journal article supplement (https://www.springermedizin.de/resource/supplementary/13054_2012_734_MOESM3_ESM.pdf/9709188)

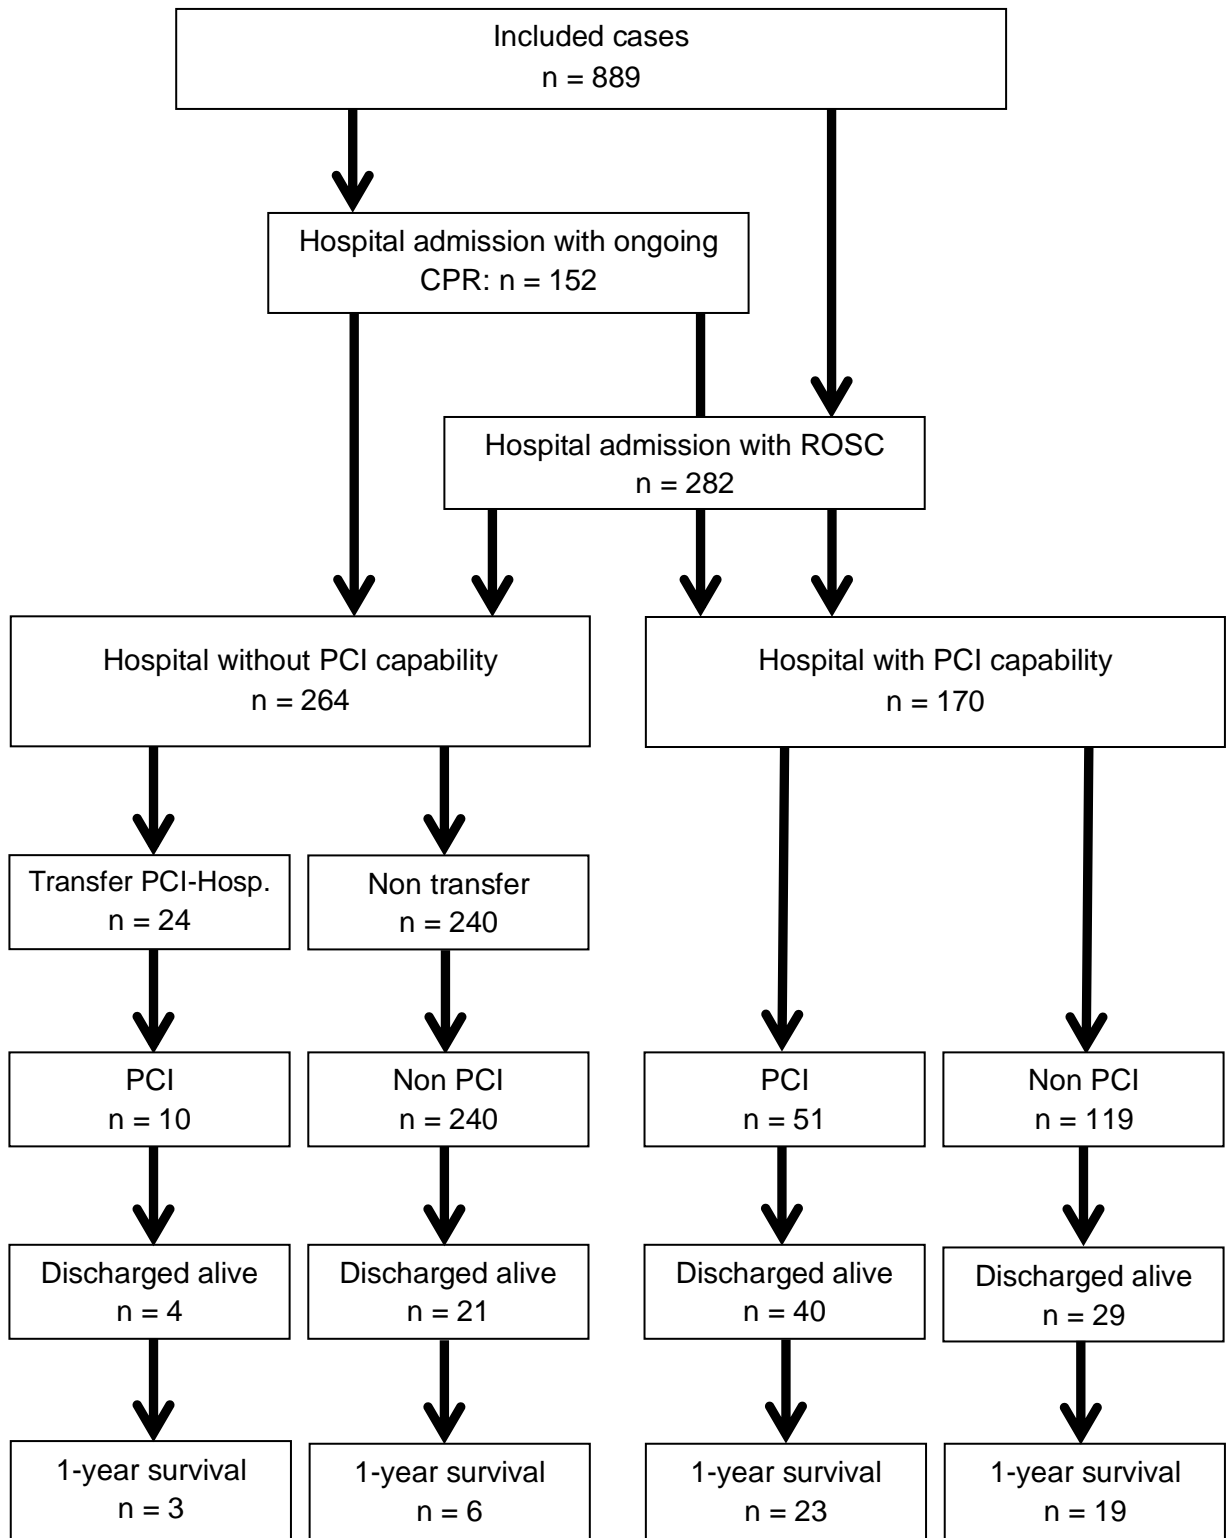

Supplement: MOESM3 [file 9709188]
